# Supplementary material for: Chetracins E and F, cytotoxic epipolythiodioxopiperazines from the marine-derived fungus Acrostalagmus luteoalbus HDN13-530
Source: Royal Society of Chemistry journal article supplement (doi:10.1039/c7ra12063j), 2017-12-19

**Supporting Information**

**Chetracins E and F, Cytotoxic  
Epipolythiodioxopiperazines from the  
Marine-derived Fungus *Acrostalagmus luteoalbus*  
HDN13-530**

Guihong Yu,<sup>a</sup> Yanjuan Wang,<sup>a</sup> Rilei Yu,<sup>a</sup> Yanyan Feng,<sup>a</sup> Lu Wang,<sup>a</sup> Qian Che,<sup>a</sup> Qianqun Gu,<sup>a</sup> Dehai Li,<sup>a, b</sup> Jing Li,<sup>a, b</sup> and Tianjiao Zhu<sup>a, \*</sup>

<sup>a</sup> Key Laboratory of Marine Drugs, Chinese Ministry of Education, School of Medicine and Pharmacy, Ocean University of China, Qingdao 266003, P. R. China

<sup>b</sup> Laboratory for Marine Drugs and Bioproducts of Qingdao National Laboratory for Marine Science and Technology, Qingdao, 266237, P. R. China

\*To whom correspondence should be addressed. Tel: 0086-532-82031632 and Fax: 0086-532-82033054. E-mail: zhutj@ouc.edu.cn

### List of Supporting Information

- M+2 negative ion isotope peaks of many sulfur-containing metabolites in fermentation extract of *A. luteoalbus* HDN13-530 (Figure S1).
- <sup>13</sup>C NMR and <sup>1</sup>H NMR Spectroscopic data of **1a** (Table S1).
- Key HMBC correlations of **1a** (Figure S2).
- HPLC analysis of conversions of **2** to **3** and standard samples (Figure S3);
- 1D, 2D NMR, NOESY and HRESIMS spectra of chetracin E (**1**) (Figure S4-S10);
- 1D, 2D NMR, NOESY and HRESIMS spectra of chetracin F (**2**) (Figure S11-S17);
- 1D, 2D NMR, NOESY and HRESIMS spectra of **1a** (Figure S18-S23).
- IR spectra of chetracin E (**1**), chetracin F (**2**) and **1a** (Figure S24-S26).

Figure S1. M+2 negative ion isotope peaks of many sulfur-containing metabolites in fermentation extract of *A. luteoalbus* HDN13-530.

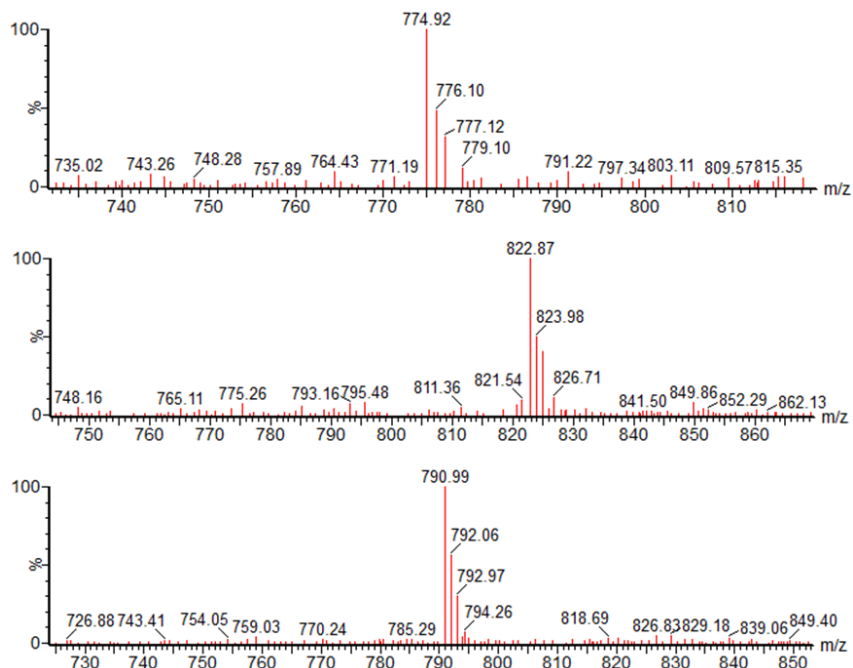

Table S1.  $^{13}\text{C}$  NMR (125 MHz) and  $^1\text{H}$  NMR (500 MHz) Spectroscopic Data of **1a** in  $\text{DMSO}-d_6$ .

| position           | <b>1a</b> (major conformor) |                                               | <b>1a</b> (minor symmetric conformor) |                                            |
|--------------------|-----------------------------|-----------------------------------------------|---------------------------------------|--------------------------------------------|
|                    | $\delta_{\text{C}}$         | $\delta_{\text{H}}$ (J in Hz)                 | $\delta_{\text{C}}$                   | $\delta_{\text{H}}$ (J in Hz)              |
| 1                  | 164.3, qC                   |                                               | 165.3, qC                             |                                            |
| 3                  | 72.1, qC                    |                                               | 71.4, qC                              |                                            |
| 4                  | 162.4, qC                   |                                               | 162.3, qC                             |                                            |
| 5a                 | 79.6, CH                    | 6.29 d (1.9)                                  | 80.5, CH                              | 5.02 d (2.1)                               |
| 6a                 | 151.2, qC                   |                                               | 151.6, qC                             |                                            |
| 7                  | 107.8, CH                   | 6.05-6.09 <sup>a</sup>                        | 108.0, CH                             | 6.27 d (7.7)                               |
| 8                  | 128.6, CH                   | 6.60-6.64 <sup>a</sup>                        | 128.7, CH                             | 6.86-6.90 <sup>a</sup>                     |
| 9                  | 116.6, CH                   | 6.15-6.18 <sup>a</sup>                        | 117.7, CH                             | 6.37-6.42 <sup>a</sup>                     |
| 10                 | 121.8, CH                   | 7.20 d (8.2)                                  | 126.3, CH                             | 6.65 d (7.7)                               |
| 10a                | 130.1, qC                   |                                               | 130.1, qC                             |                                            |
| 10b                | 63.9, qC                    |                                               | 66.8, qC                              |                                            |
| 11                 | 82.2, CH                    | 4.73 d (9.5)                                  | 82.1, CH                              | 5.07 d (7.1)                               |
| 11a                | 72.0, qC                    |                                               | 73.0, qC                              |                                            |
| 12                 | 28.2, CH <sub>3</sub>       | 2.88 s                                        | 28.4, CH <sub>3</sub>                 | 2.95s                                      |
| 13                 | 63.4, CH <sub>2</sub>       | 4.17 dd (11.8, 6.0)<br>3.61-3.69 <sup>a</sup> | 63.2, CH <sub>2</sub>                 | 4.17 dd (11.8, 6.0)<br>3.98 dd (11.6, 6.2) |
| 3-SCH <sub>3</sub> | 13.3, CH <sub>3</sub>       | 2.16 s                                        | 13.3, CH <sub>3</sub>                 | 2.08 s                                     |

|                       |                       |                        |                       |                        |
|-----------------------|-----------------------|------------------------|-----------------------|------------------------|
| 11a-SCH <sub>3</sub>  | 15.8, CH <sub>3</sub> | 1.82 s                 | 15.9, CH <sub>3</sub> | 1.82 s                 |
| 6-NH                  |                       | 6.85 s                 |                       | 6.67 s                 |
| 11-OH                 |                       | 7.25 brs               |                       | 5.99 d (7.2)           |
| 13-OH                 |                       | 4.93 t (7.0)           |                       | 5.10 t (4.5)           |
| 1'                    | 163.9, qC             |                        | 164.6, qC             |                        |
| 3'                    | 67.8, qC              |                        | 68.3, qC              |                        |
| 4'                    | 163.6, qC             |                        | 163.6, qC             |                        |
| 5a'                   | 79.9, CH              | 6.33 d (1.9)           | 80.3, CH              | 5.02 d (2.1)           |
| 6a'                   | 151.2, qC             |                        | 151.7, qC             |                        |
| 7'                    | 107.9, CH             | 6.05-6.09 <sup>a</sup> | 108.2, CH             | 6.31 d (7.8)           |
| 8'                    | 128.7, CH             | 6.60-6.64 <sup>a</sup> | 128.7, CH             | 6.86-6.90 <sup>a</sup> |
| 9'                    | 116.6, CH             | 6.15-6.18 <sup>a</sup> | 117.2, CH             | 6.37-6.42 <sup>a</sup> |
| 10'                   | 121.8, CH             | 7.16 d (8.2)           | 127.3, CH             | 7.71 d (7.7)           |
| 10a'                  | 129.8, qC             |                        | 130.5, qC             |                        |
| 10b'                  | 63.4, qC              |                        | 66.5, qC              |                        |
| 11'                   | 81.7, CH              | 4.83 d (4.8)           | 81.6, CH              | 5.13 d (7.0)           |
| 11a'                  | 72.1, qC              |                        | 72.8, qC              |                        |
| 12'                   | 28.2, CH <sub>3</sub> | 2.93 s                 | 29.0, CH <sub>3</sub> | 2.95 s                 |
| 13'                   | 24.7, CH <sub>3</sub> | 1.74 s                 | 25.1, CH <sub>3</sub> | 1.65 s                 |
| 3'-SCH <sub>3</sub>   | 14.5, CH <sub>3</sub> | 2.16 s                 | 14.3, CH <sub>3</sub> | 2.06 s                 |
| 11a'-SCH <sub>3</sub> | 16.0, CH <sub>3</sub> | 1.82 s                 | 15.8, CH <sub>3</sub> | 1.81 s                 |
| 6'-NH                 |                       | 6.85 s                 |                       | 6.64 s                 |
| 11'-OH                |                       | 7.05 brs               |                       | 5.54 d (6.9)           |

<sup>a</sup> Signals were overlapped.

Figure S2. Key HMBC correlations of **1a**.

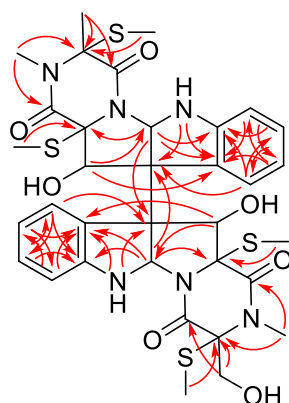

Figure S3. HPLC analysis of conversions of **2** to **3** and standard samples.

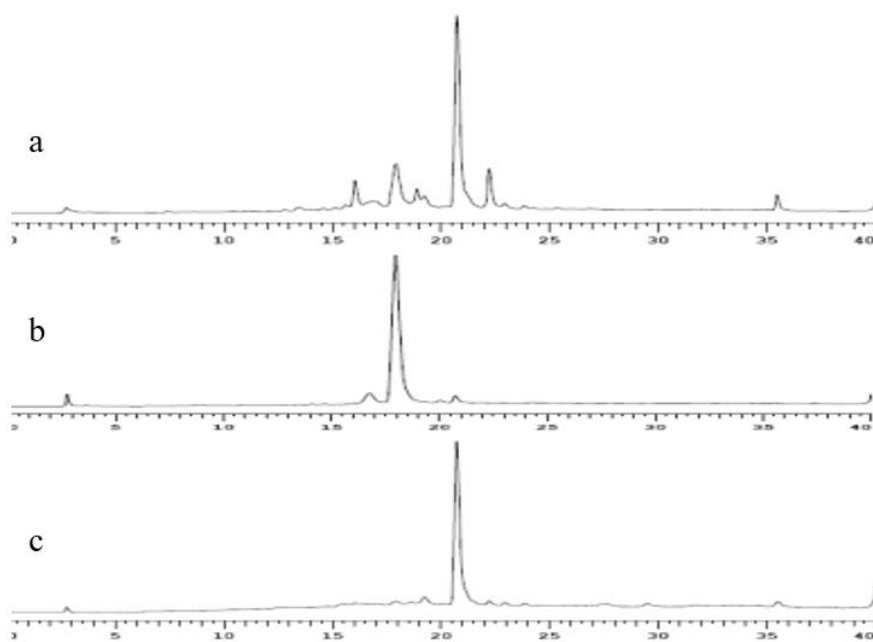

Note: a: conversion of **2** to **3** in DMSO after two weeks; b: standard sample of **3**; c: standard sample of **2**. The data were collected by HPLC with MeOH (with 1/1000 formic acid) and water (with 1/1000 formic acid) (0-2 min: 50:50, 2-30 min: from 50:50 to 100:0, 30-35: 100:0, 35-36 min: from 100:0 to 50:50, 36-40 min: 50:50).

Figure S4.  $^1\text{H}$  NMR spectrum (500 MHz) of chetracin E (**1**) in DMSO

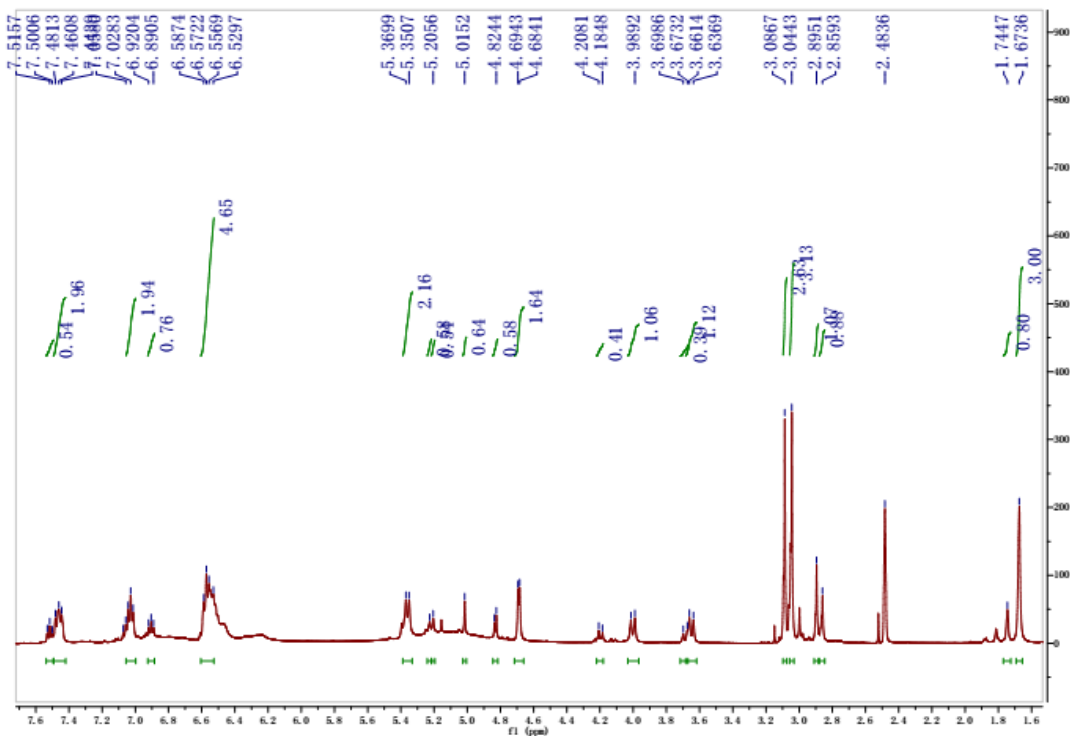

Figure S5.  $^{13}\text{C}$  NMR spectrum (125 MHz) of chetracin E (**1**) in DMSO

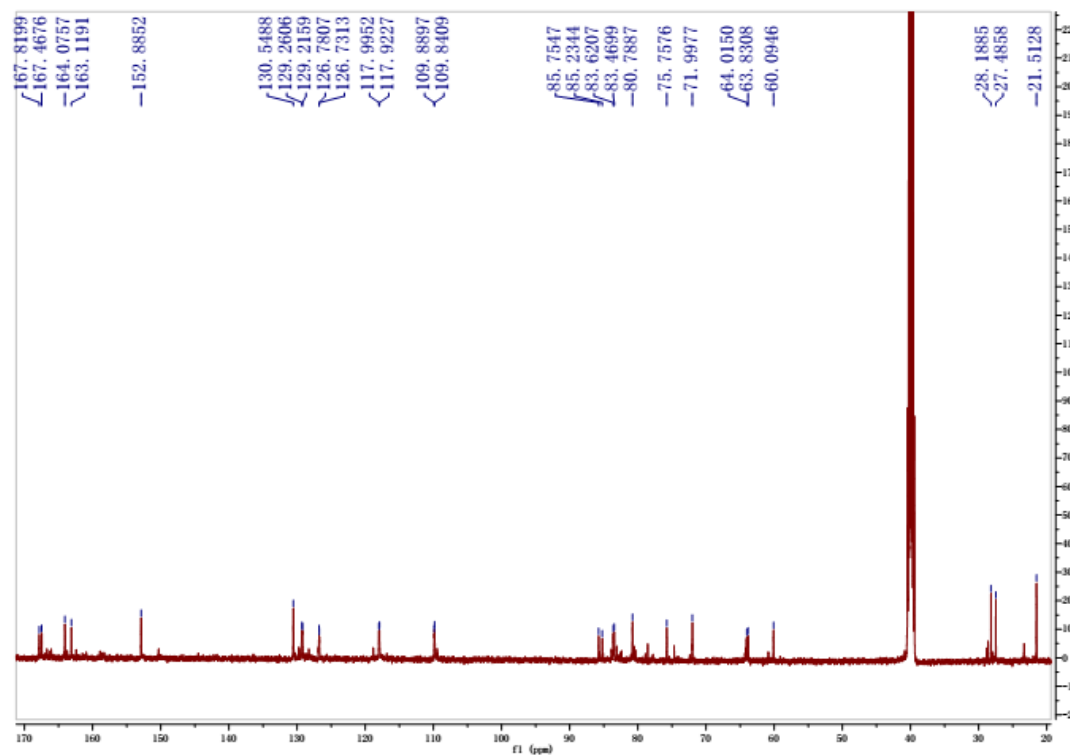

Figure S6. HMQC spectrum of chetracin E (1)

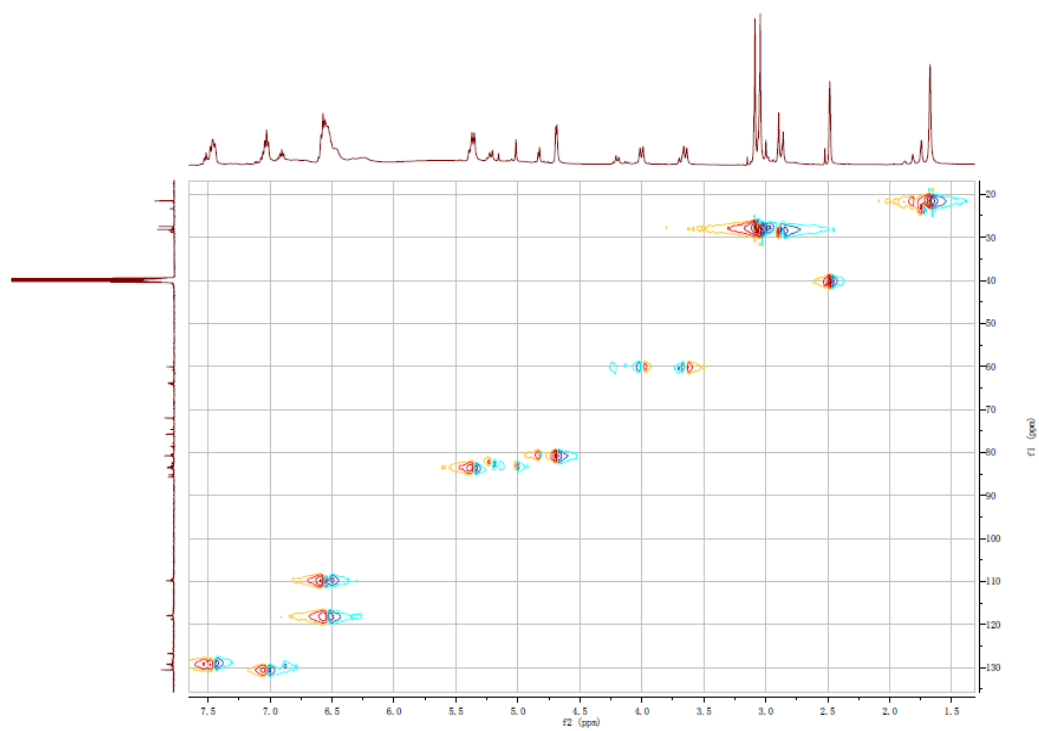

Figure S7. COSY spectrum of chetracin E (1)

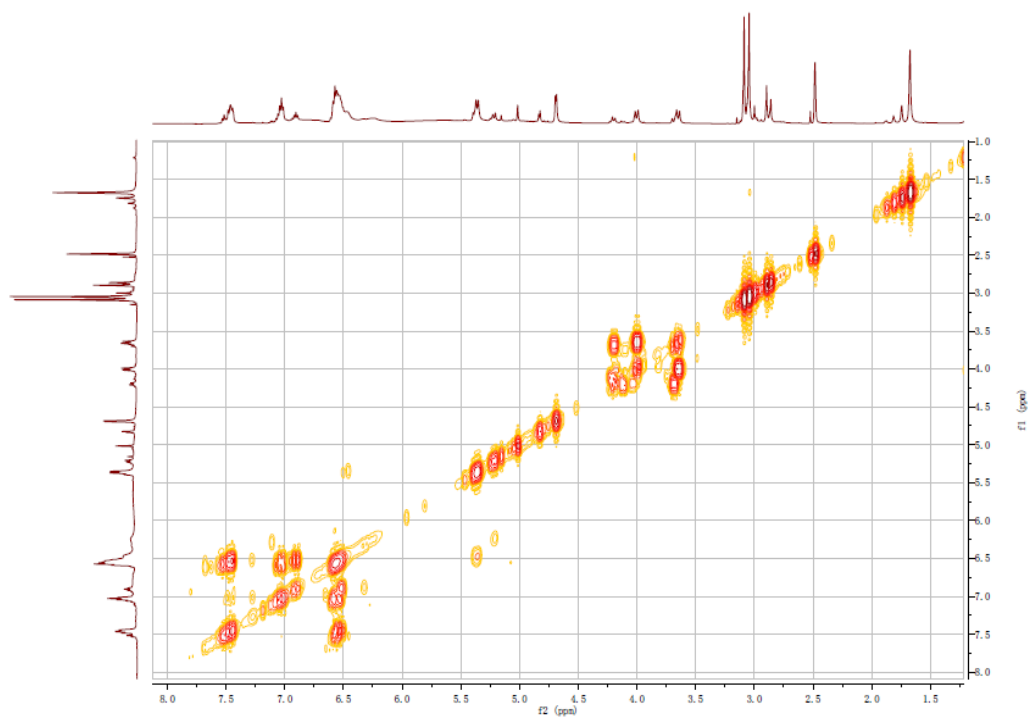

Figure S8. HMBC spectrum of chetracin E (1)

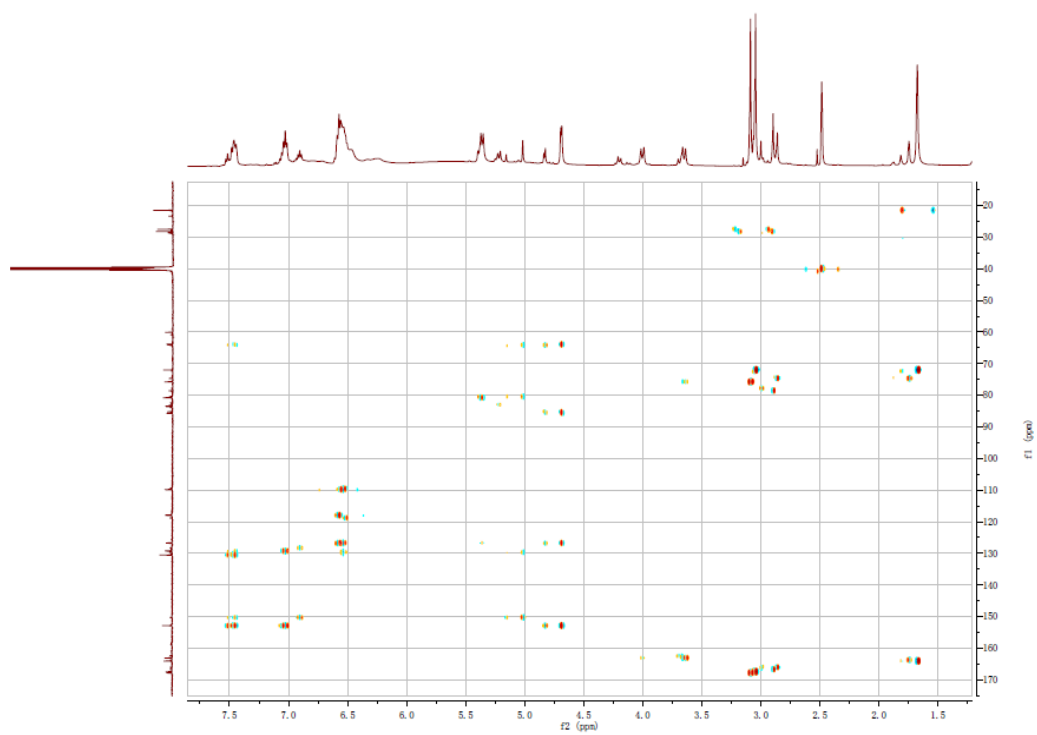

Figure S9. NOESY spectrum of chetracin E (1)

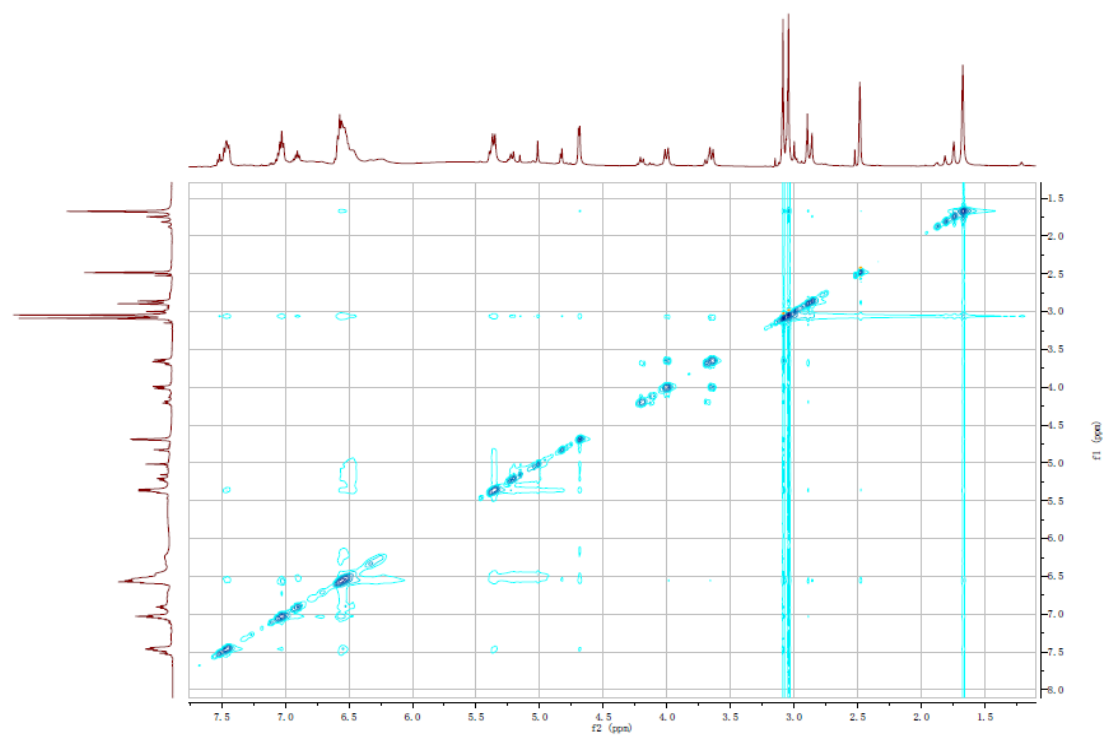



Figure S10. HRESIMS spectrum of chetracin E (1)

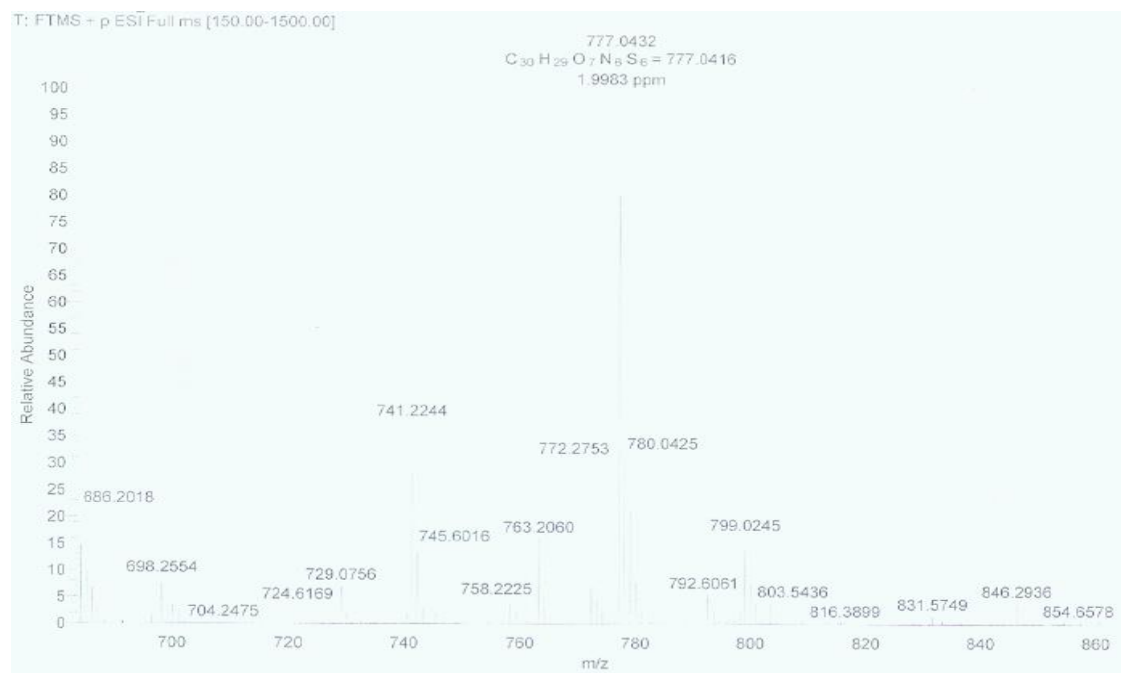

Figure S11.  $^1H$  NMR spectrum (500 MHz) of chetracin F (2) in DMSO

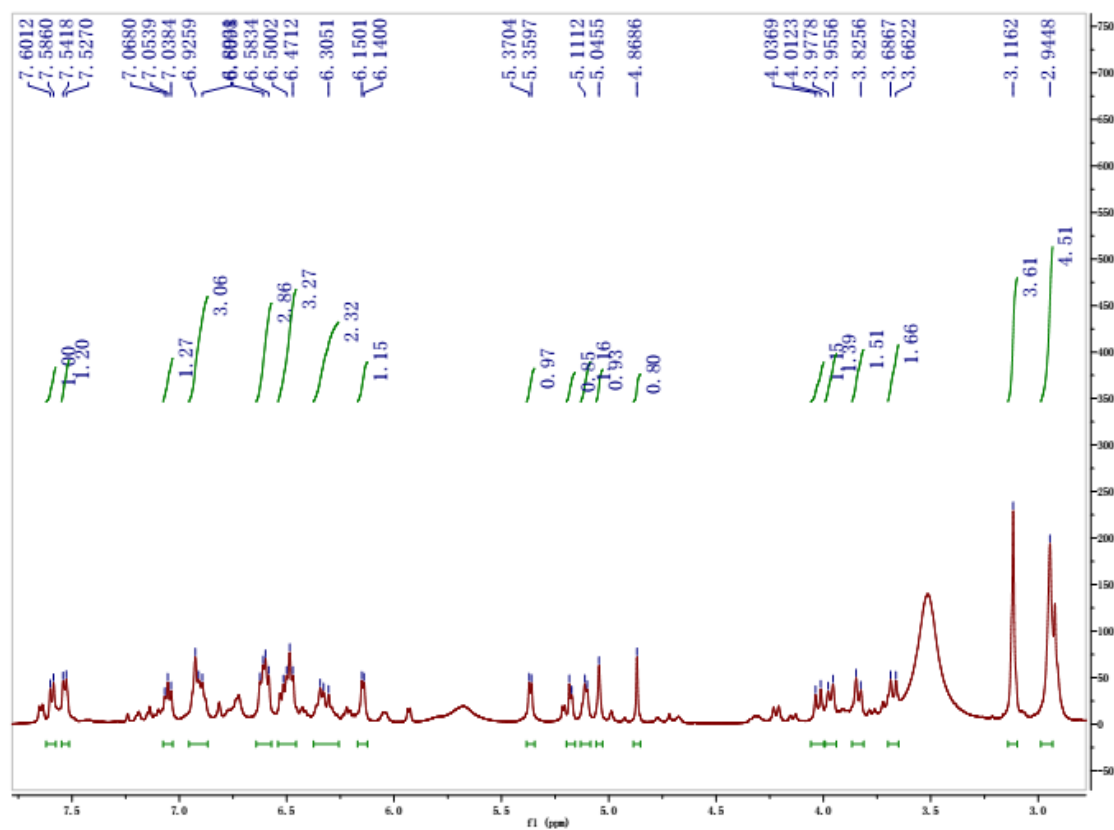

Figure S12.  $^{13}\text{C}$  NMR spectrum (125 MHz) of chetracin F (**2**) in DMSO

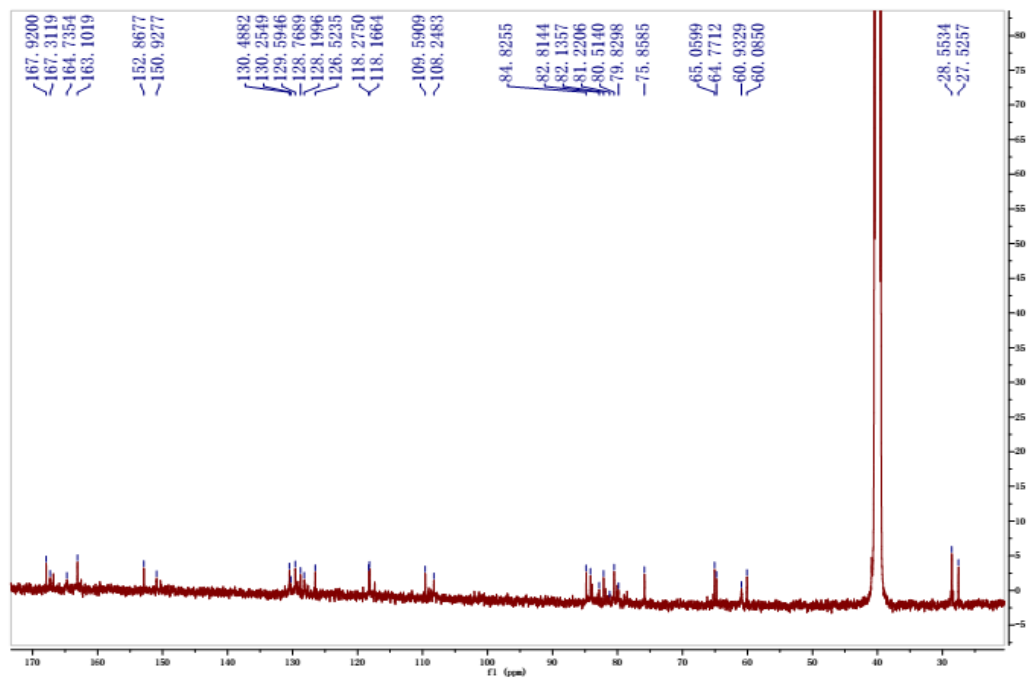

Figure S13. HMQC spectrum of chetracin F (**2**)

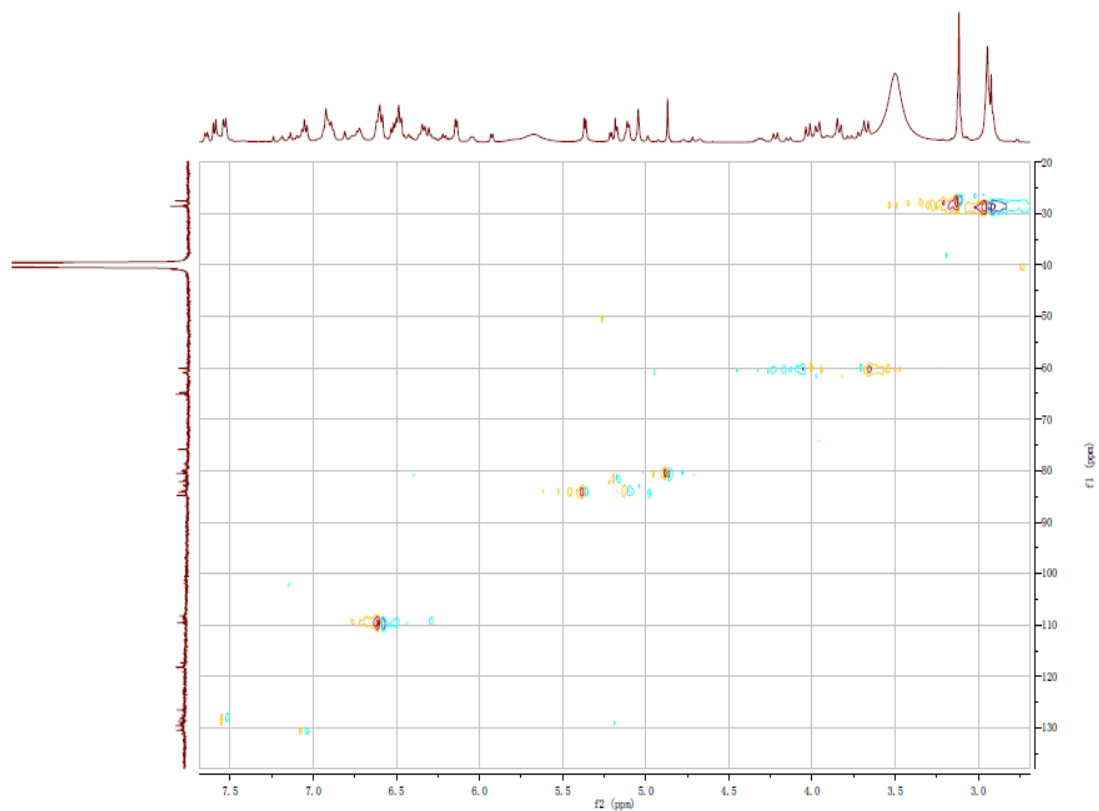

Figure S14. COSY spectrum of chetracin F (2)

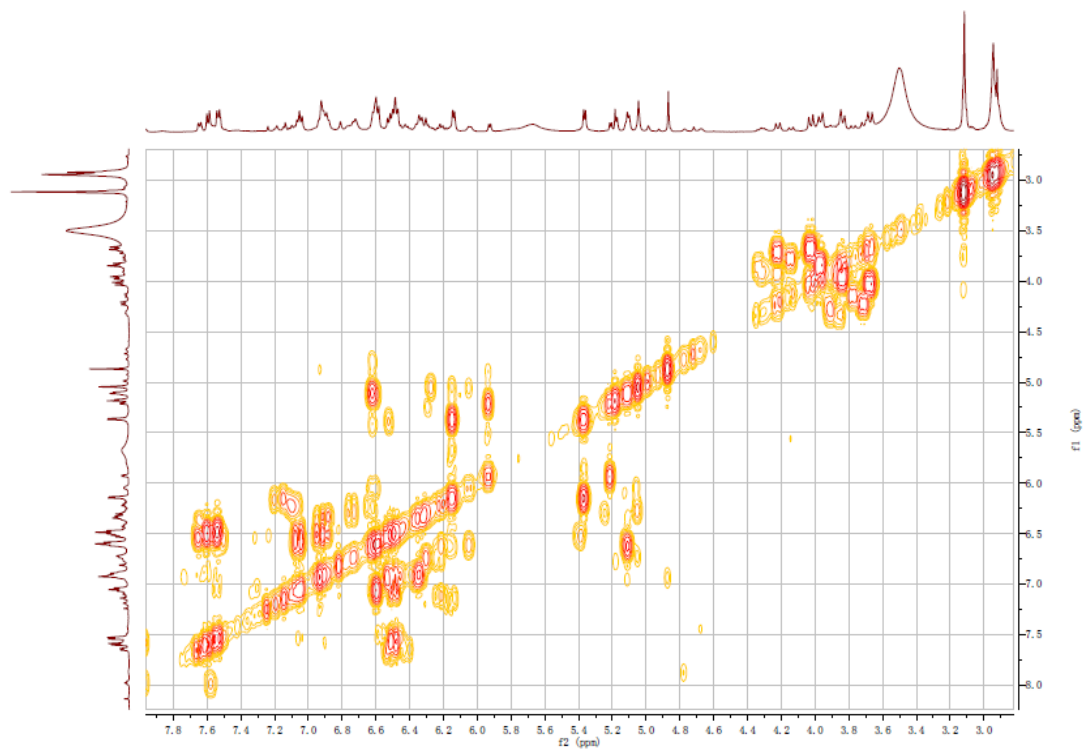

Figure S15. HMBC spectrum of chetracin F (2)

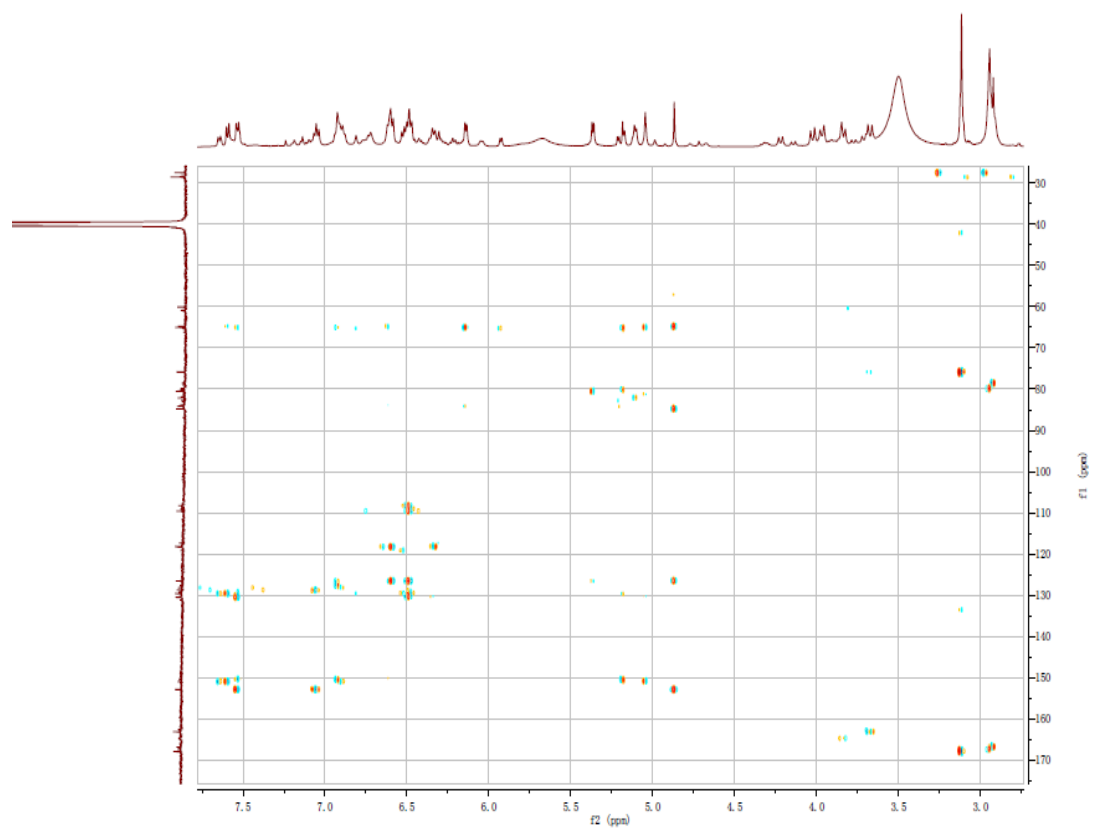

Figure S16. NOESY spectrum of chetracin F (2)

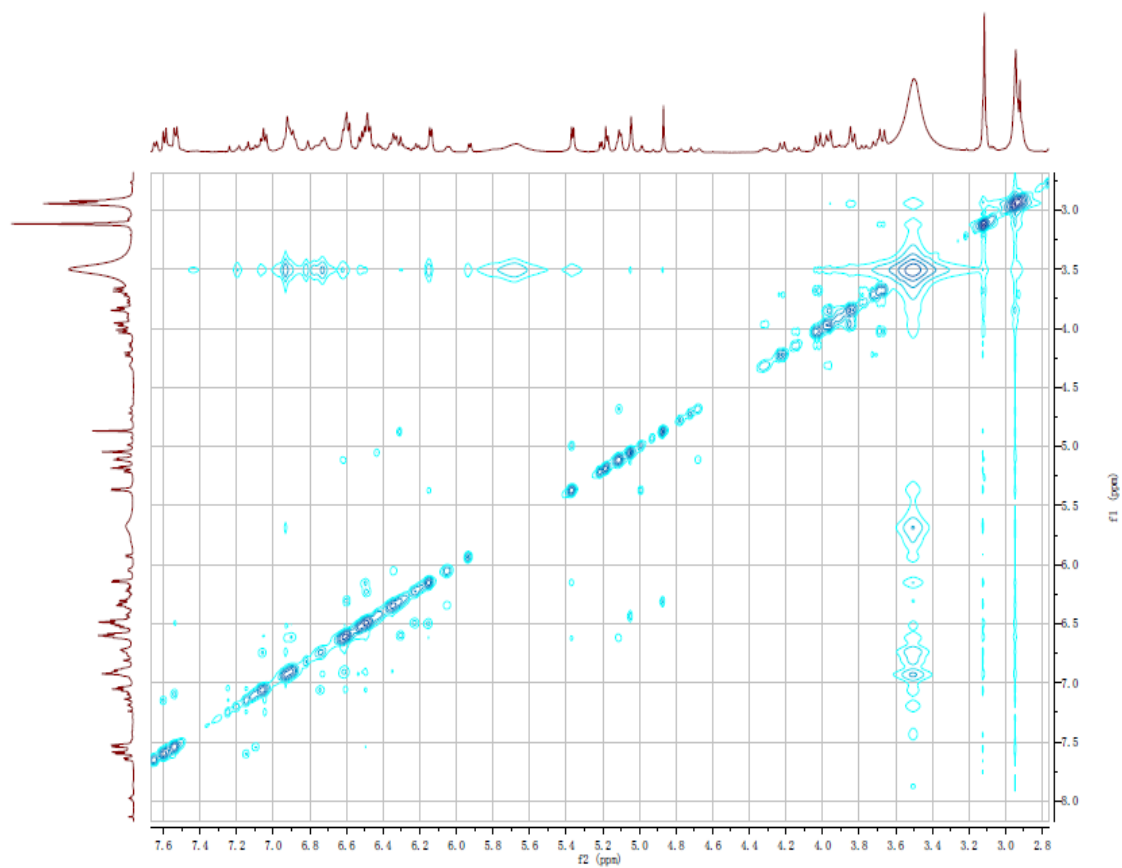

Figure S17. HRESIMS spectrum of chetracin F (2)

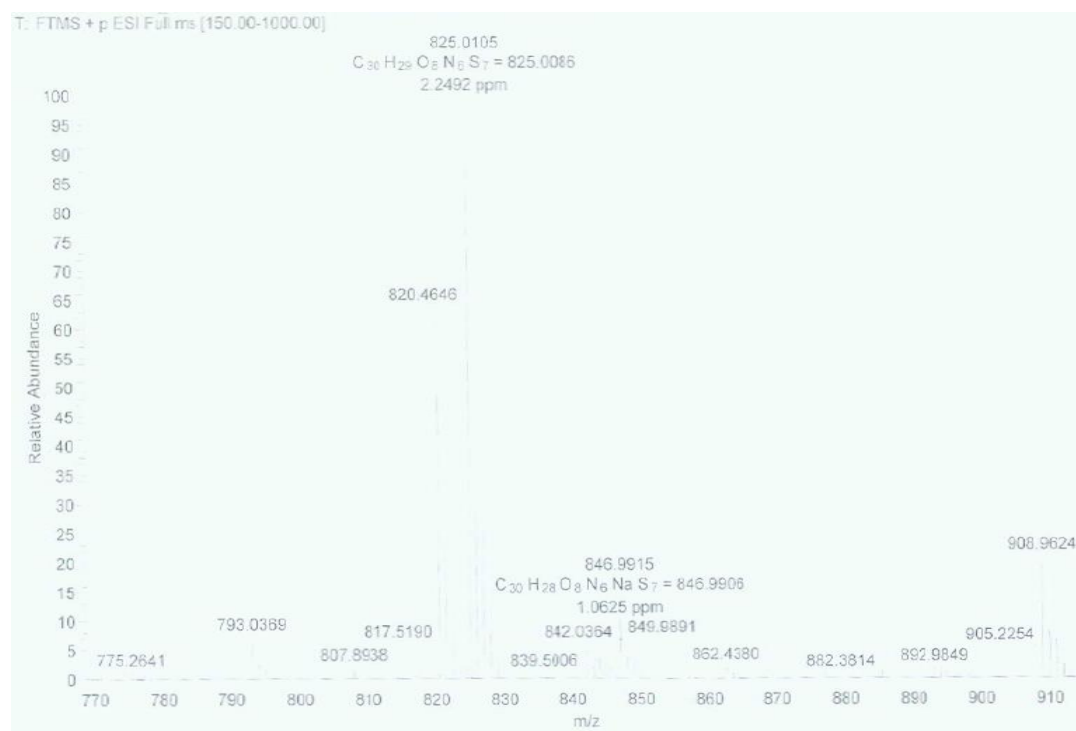

Figure S18.  $^1\text{H}$  NMR spectrum (500 MHz) of **1a** in DMSO

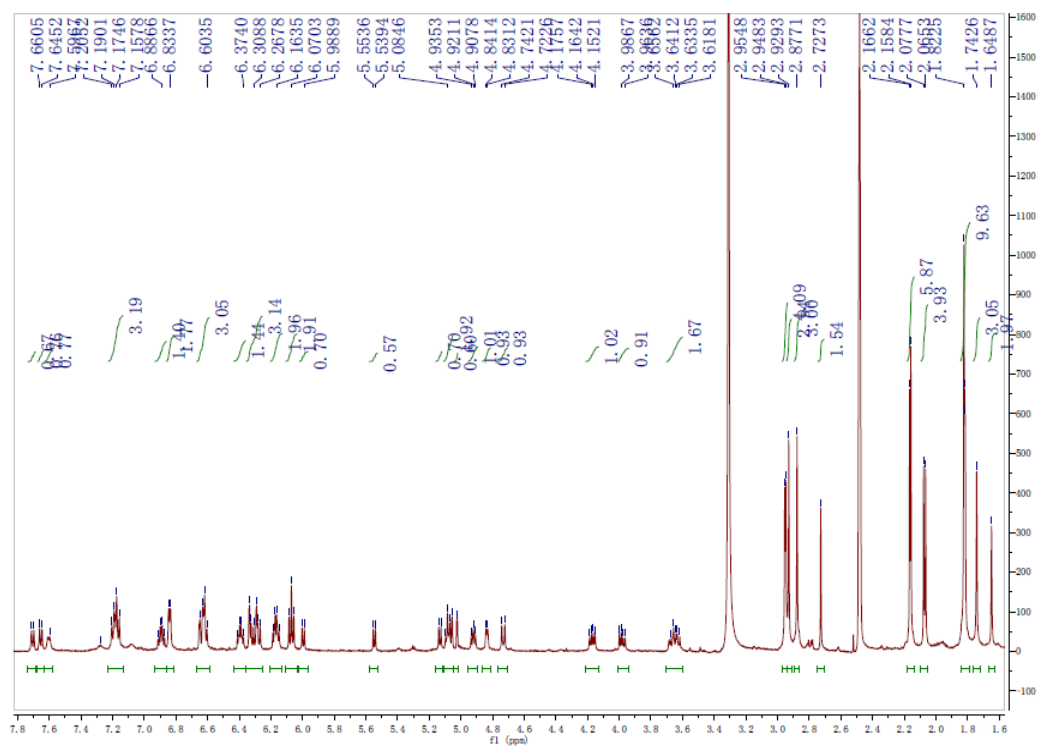

Figure S19.  $^{13}\text{C}$  NMR spectrum (125 MHz) of **1a** in DMSO

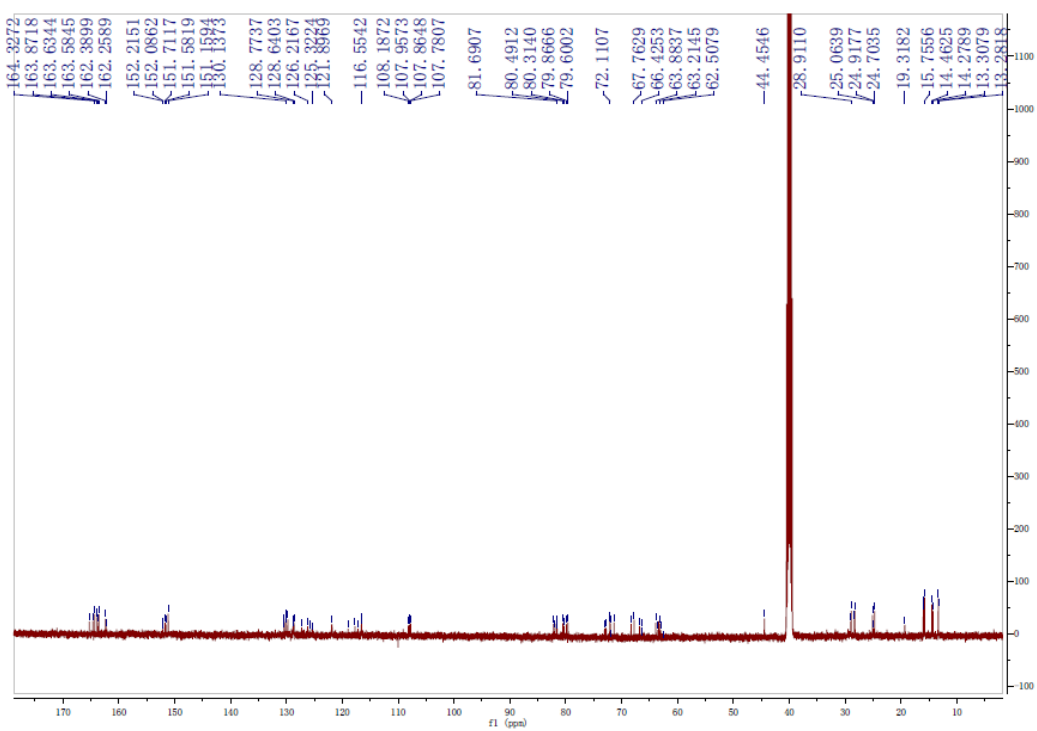

Figure S20. HMQC spectrum of **1a**

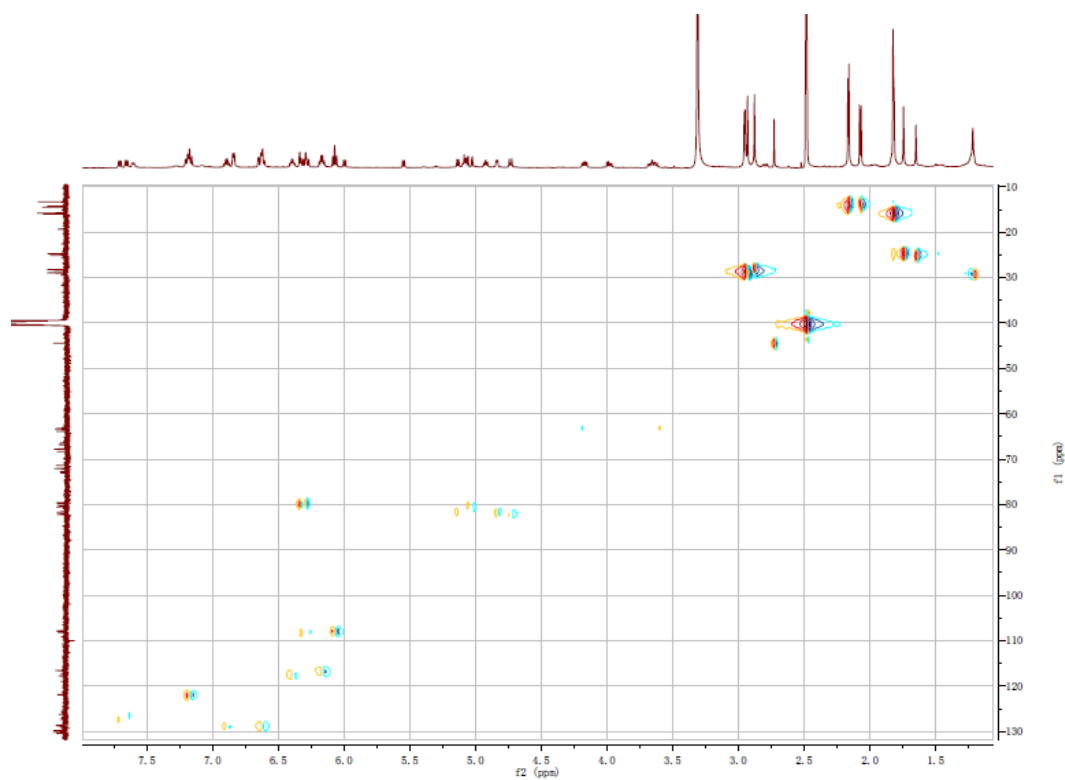

Figure S21. HMBC spectrum of **1a**

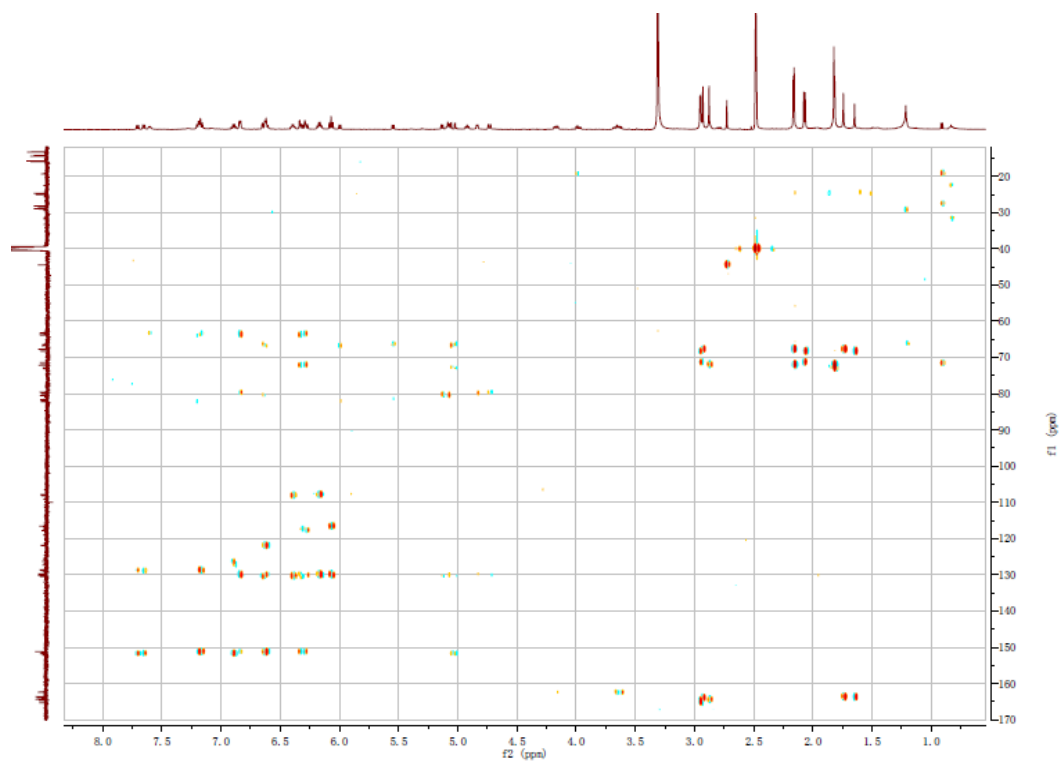

Figure S22. NOESY spectrum of **1a**

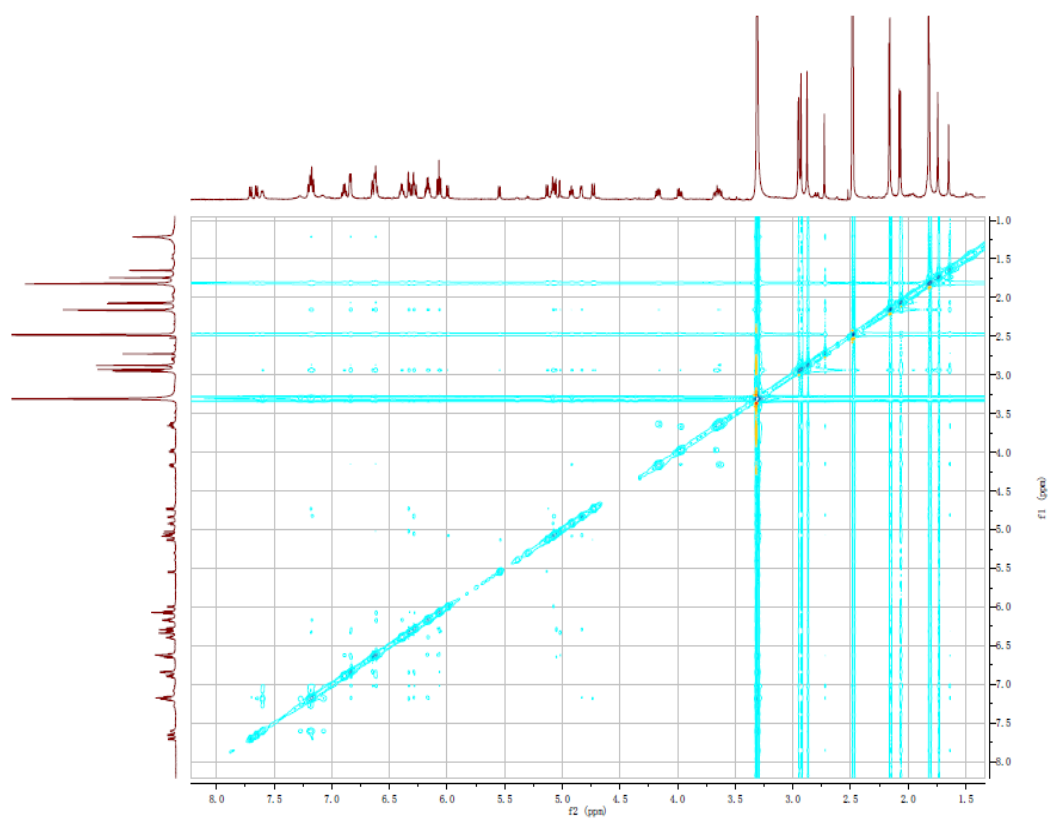

Figure S23. HRESIMS spectrum of **1a**

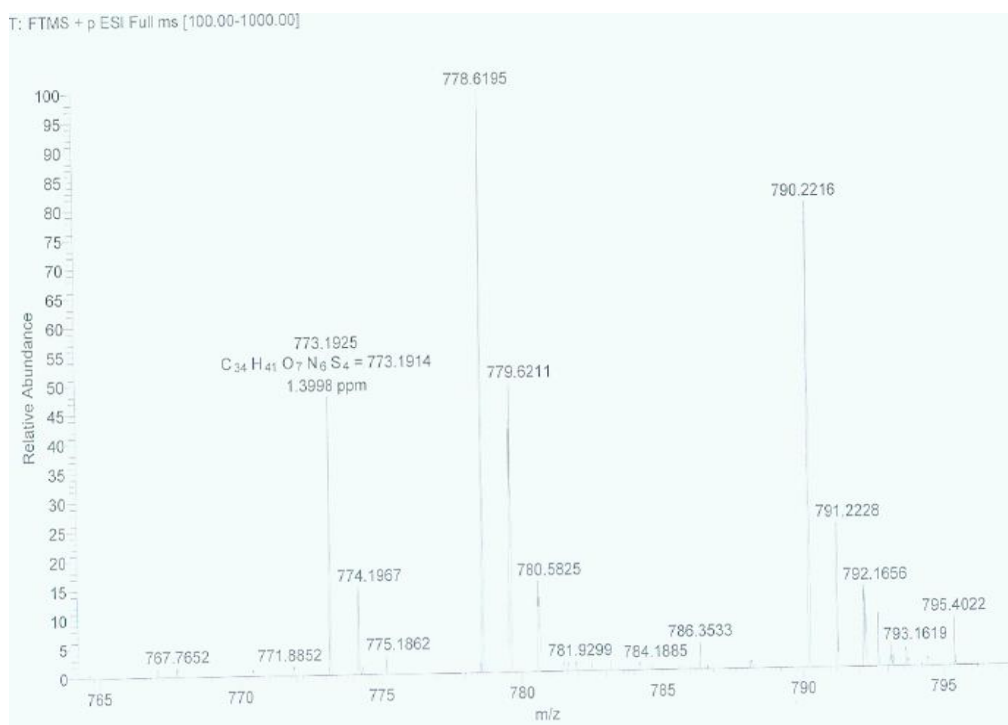

Figure S24. IR spectrum of chetracin E (1)

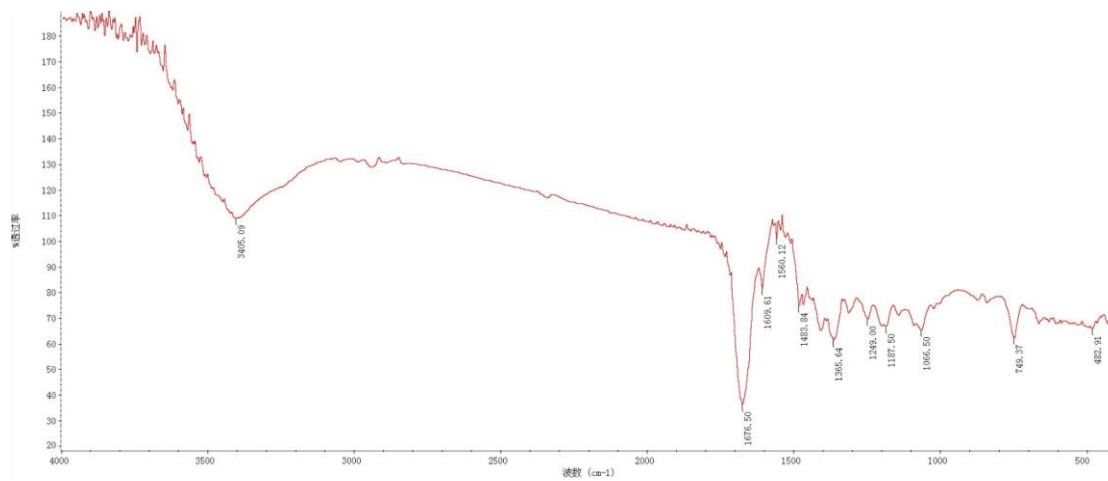

Figure S25. IR spectrum of chetracin F (2)

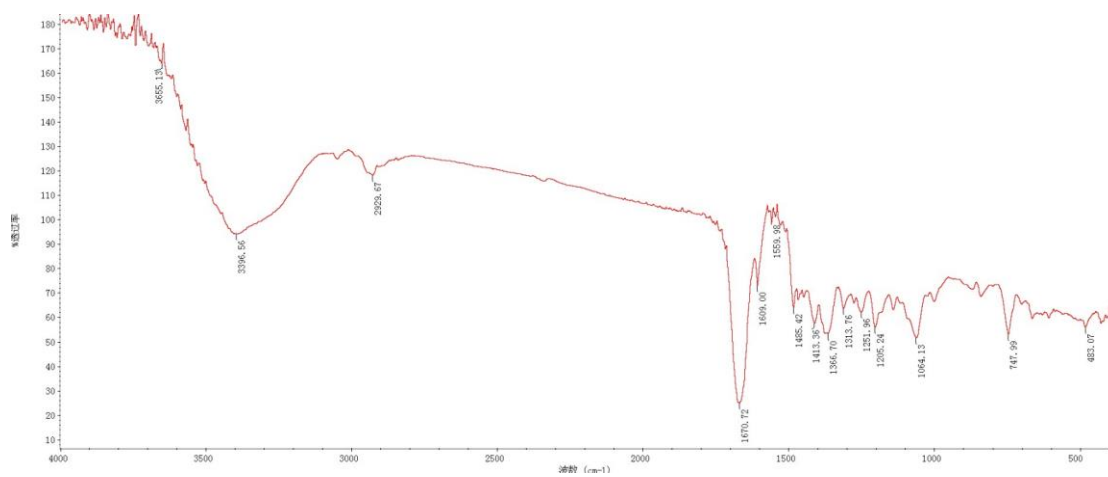

Figure S26. IR spectrum of **1a**

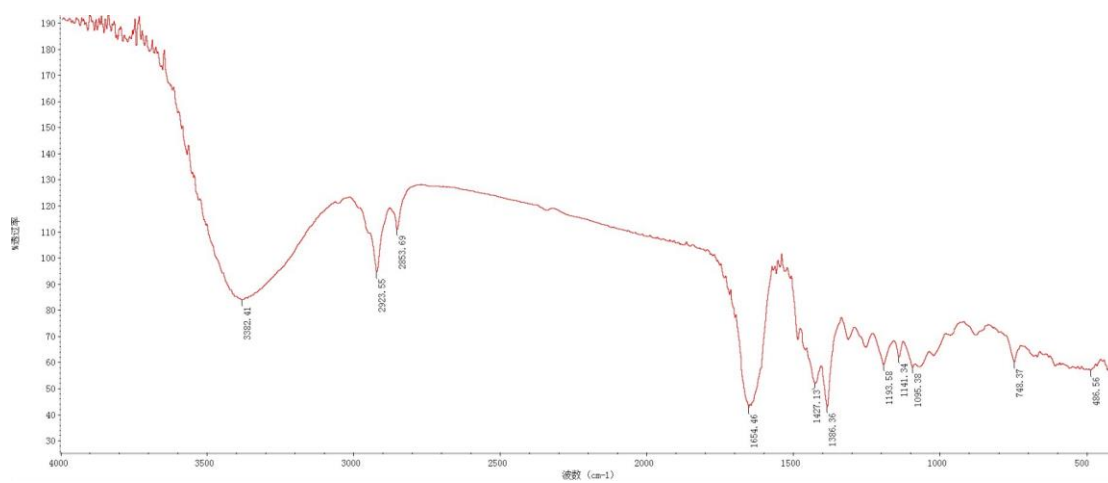

Supplement: c7ra12063j1.pdf [file c7ra12063j1.pdf]
